# Supplementary material for: Surface tension and hygroscopicity analysis of aerosols containing organosulfate surfactants
Source: Copernicus journal article supplement (doi:10.5194/acp-25-14301-2025), 2025-11-03
Supplement: Supplementary file 1 [file Surface-tension-and-RI.xlsx]

## Sheet: Fig. 2
	Concentration (M)	Density (g/cm^3)	Water activity	RI
	2.5	1.164	0.906	1.3572
	2	1.132	0.9322	1.3526
	1.5	1.105	0.9565	1.3474
SMS	1	1.072	0.9793	1.3436
	0.75	1.046	0.9879	1.3406
	0.5	1.025	0.9921	1.3384
	0.25	1.017	0.9958	1.3384
	4	1.271	0.8235	1.3726
	3.5	1.216	0.8621	1.367
	3	1.197	0.897	1.3626
	2.5	1.154	0.9245	1.359
SES	2	1.132	0.948	1.3564
	1.5	1.099	0.967	1.35
	1	1.054	0.9854	1.344
	0.75	1.047	0.9912	1.342
	0.5	1.03	0.9975	1.339
	0.25	1.007	0.99954	1.3355
	2	1.083	0.9717	1.3746
SOS	1	1.052	0.9846	1.3569
	0.5	1.023	0.992	1.3451
	0.1	1.014	0.994	1.3343
	2	1.09	0.983	1.373
SDeS	1	1.036	0.9848	1.3623
	0.5	1.007	0.99	1.3482
	0.1	1.002	0.993	1.3364
	1	1.032	0.9894	1.3683
SDS	0.5	1.017	0.9943	1.3486
	0.1	1.004	0.998	1.336

## Sheet: Fig. 3
	RH (%)	Surface tension (mN m-1)	err (mN m-1)	n0	n1 (nm^2)	n (at lambda=589 nm)		Notes:
	92.2	60.4				1.355
	94.55	62.4				1.35
SMS-Bulk	96.63	64				1.347
	97.49	64.6				1.343
	98.21	65.5				1.34
	98.58	66.5
	77.6	50.77				.
	81.54	52.35				.
	85.08	53.39				1.37
	88.37	55.36				1.364
SES-Bulk	91.24	55.95				1.36
	94.18	58.35				1.356
	97.1	60.36				1.35
	97.58	62.37				1.347
	98.33	63.28				1.344
	99.954	65.2				1.335
	99	67.9
	99	67.5
	99	68.37
	99	67.16
	99	66.1
	99	63.4
	97	65.2
SMS-Bain	96	65.3
	95	66.2
	93.75	63.44
	92.4	62.64
	91.3	63.38
	90	61.22	--
	87.2	58.78	--
	81	59.32	--
	77.7	59	--
	73.2	58.69	--
	100	74	--
	99	68.4
	99	63.5
	99	59.87
	99	59.6
	98	59.1
SES-Bain	98	58.3
	97	57.6
	96	56.3
	95.5	55.97
	94	56.75
	93	54.35
	76	52.62
	44	54.8	1.6	1.385	10.3	1.385		n(lambda) = n0 + n1/(lambda^2)
	49	56.1	1.2	1.383	10.1	1.383
	54	55.8	1.6	1.383	10.1	1.383
	58	58.3	1.7	1.381	10.2	1.381
SMS-Electrodeformation	63	58.6	1.5	1.377	10.2	1.377
	69	58.9	1.2	1.367	10.2	1.367
	72	59.8	1.4	1.364	10.2	1.364
	77	60	1.8	1.357	10.4	1.357
	81	60.4	1.3	1.348	10.3	1.348
	87	60.5	1.5	1.347	10.17	1.347
	20			1.64	14.4	1.64
	25			1.577	15.3	1.577
	30			1.525	17.2	1.525
	33	32	1.3	1.47	15.5	1.47
	36.3	33.6	0.9	1.432	19.2	1.432
	39.7	34.8	1	1.399	10.51	1.399
	40	34.6	1	1.399	10.01	1.399
	44	34.2	1.3	1.398	1.033	1.398
	46	37.4	1.6	1.395	10.47	1.395
SES-Electrodeformation	50	40	1.1	1.392	10.46	1.392
	53	41.1	1.4	1.389	10.55	1.389
	56	41.4	1.6	1.385	10.48	1.385
	60	41.8	1.1	1.381	10.56	1.381
	63	43	1.4	1.377	10.42	1.377
	68.7	47.3	1.3	1.367	10.43	1.367
	74.5	49.9	1.2	1.363	10.48	1.363
	80	52	1.4	1.36	10.54	1.36
	84	55.18	1	1.358	10.439	1.358

## Sheet: Fig. 4
	RH(%)	Surface tension (mN/m)	Err(mN/m)
	58.4124	79.02	0.8
	59.4458	78.6555	0.6
	61	78.3234	0.6
	63.6244	78.3595	0.6
Electrodeformation	66.7344	77.908	0.6
NaCl + SMS (10:1)	70.6566	77.2547	1
	73.7143	76.6049	0.9
	77.492	76.1486	0.6
	80.2512	75.2315	1.2
	82.6914	74.8522	0.8
	85.7074	74.5335	0.6
	88.6348	74.0292	1.2
	61.609	64.4747	1.1
	63.2281	64.8121	1
	65	65.1254	0.9
	66.6366	65.5729	1
Electrodeformation	68.4712	65.2559	0.9
NaCl + SES (10:1)	70	66.1783	0.6
	71.5088	65.8106	0.7
	73.4035	66.1831	0.9
	76.8722	67.2293	0.5
	80.5413	67.7523	0.4
	84.9724	68.5528	1.1
	89.1529	69.5197	1
	24.0829	61.8675	0.1
	31.113	61.9697	0.5
	35.8966	62.1687	0.2
	39.2664	62.0396	0.5
	44.5147	62.3031	0.5
	48.7947	62.1848	0.3
Electrodeformation	53.0747	62.5505	0.7
CA + SMS (10:1)	59.0203	62.443	0.2
	62.0996	62.4045	0.7
	67.7352	62.5699	0.4
	72.4994	62.6548	0.9
	75.54	62.7564	0.6
	79.239	63.2658	0.7
	82.9961	63.7121	0.8
	89.0579	65.2234	0.95
	21.8945	59.5873	0.4
	26.4844	59.4314	0.5
	30.4739	59.7809	0.5
	37.7945	59.4367	0.9
	41.4741	59.7218	0.4
	46.9549	59.7433	0.3
Electrodeformation	52.1645	59.9423	0.6
CA + SES (10:1)	57.9939	59.9154	0.6
	61.6735	60.109	0.4
	65	59.9	0.5
	70.4466	60.2542	0.6
	74.6685	60.437	0.7
	78.2513	61	0.6
	83	62	0.9
	87.8184	63	1.2
	92.1953	64.7	1.3
	57	86.1784	0.5066
	60	84.4584	1.34795
	62	83.8631	1.83034
	64	83.3854	1.35712
Electrodeformation	66	82.6968	0.59749
NaCl	68	82.2489	1.5
	70	81.2315	1.1
	72	80.3743	0.78053
	74	80.069	1.51971
	76	79.0029	1.41819
	78.7526	78.0218	1.5
	82.23	77.1608	0.96594
	86	75.8547	1
	83.3641	65.3793	0.4
	80.7496	64.8361	0.9
	78.14	64.6	0.8
	74.24	64.1	0.4
	69.7881	64	0.8
Electrodeformation	64.17	63.8	0.3
CA	60.2	63.9	0.6
	55.8	63.8	0.5
	49.0658	63.8735	0.7
	45.3862	63.5992	0.7
	40.2734	63.6315	0.4
	34.6377	63.3572	0.8
	30.52	63.3	0.8
	26.3876	63.4486	0.8
	85	65.7
	87	66.1
Bulk	90	66.8
CA	93	67.5
	95	68.5
	97	69.3
	98	70.3
	85	64
Bulk	90.5104	65.5
CA + SMS (10:1)	93.4735	67
	97.4049	69
	98.4313	69.5
	84.9909	62
Bulk	91.44	64
CA + SES (10:1)	95.1196	67
	98.0827	69.5
	99	70
	87.5593	76.0105
Bulk	92.5168	74.4809
NaCl	94.9378	73.3714
	98.0925	72.9038
	90.3787	74.1401
Bulk	92.8521	73.0306
NaCl + SMS (10:1)	94.9378	72.7294
	98.2602	72.349
	90.7455	69.6759
Bulk	93.5753	70.5001
NaCl + SES (10:1)	96.1536	70.8432
	98.2916	71.5406

## Sheet: Fig. 5
	RH(%)	Surface tension (mN/m)	err(mN/m)
	87	66.1
	90	66.8
Bulk	93	67.5
CA	95	68.5
	97	69.3
	98	70.3
	85	65.9	0.8
	80	65.2	0.4
	75	64.5	0.2
	70	64.4	0.6
	65	63.9	0.4
Electrodeformation	60	63.5	0.7
CA	55	63.7	0.2
	50	63.7	0.6
	45	63.4	0.5
	40	63.2	0.3
	35	63.5	0.8
	30	63.3	0.7
	25	63.44	1
	100	72.2
Bulk	99.5	64
CA + SOS(100:1))	98	60.5
	95	56
	92	49	2.4
	85	44.8	2
	80	43.2	1.5
	75	42.2	1
	70	41.8	0.7
Electrodeformation	65	41.8	1.9
CA + SOS(100:1))	60	41.6	0.5
	55	41.7	1.2
	50	41.2	1.2
	45	41.6	1
	40	41.5	0.9
	35	41	0.8
	30	41.2	1.2
	25	41.2	1.1
	22	41	1.3
	100	72.2
Bulk	98.4108	54.7092
CA + SDS(1000:1)	96.938	47.2289
	94.7481	42.8257
	91.45	39.1	2.8
	85	37.5	2.3
	80	37.2	1.3
	75	37	1
	70	36.5	0.5
Electrodeformation	65	36.8	1.2
CA + SDS(1000:1)	60	36.5	1.3
	55	36.2	1.2
	50	36.3	1
	45	36.1	0.7
	40	36.2	1.2
	35	36	0.9
	28.9	36.1	1.2
