# Supplementary material for: Surface tension and hygroscopicity analysis of aerosols containing organosulfate surfactants
Source: Copernicus journal article supplement (doi:10.5194/acp-25-14301-2025), 2025-11-03
Supplement: Supplementary file [file acp-25-14301-2025-supplement-title-page.pdf › acp-25-14301-2025-supplement-title-page.pdf]

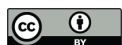

*Supplement of*

## **Surface tension and hygroscopicity analysis of aerosols containing organosulfate surfactants**

**Vahid Shahabadi et al.**

*Correspondence to:* Thomas C. Preston ([thomas.preston@mcgill.ca](mailto:thomas.preston@mcgill.ca))

- [acp-25-14301-2025-supplement-title-page.pdf](#)
- [Surface-tension-and-RI.xlsx](#)

The copyright of individual parts of the supplement might differ from the article licence.
